# Supplementary material
Source: PubMed Central journal article supplement (PMC4349241)
Supplement: cr201512x1.pdf [file cr201512x1.pdf]

## Supplementary information, Figure S1

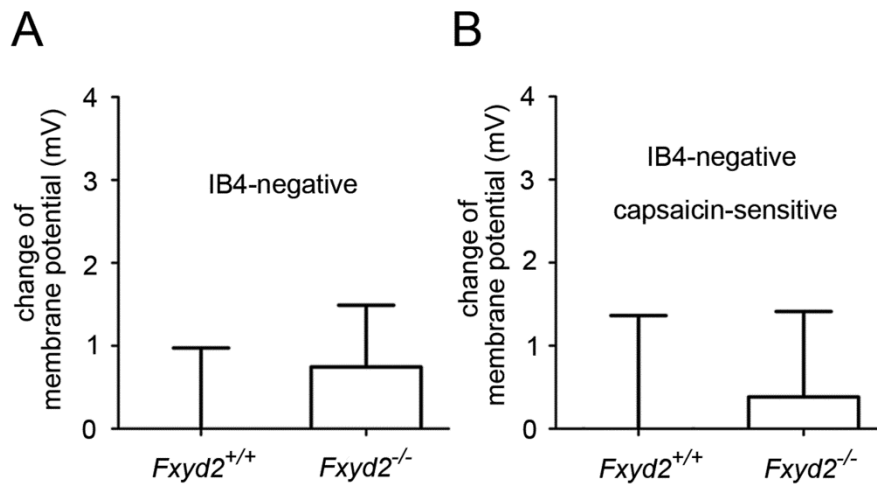

**Figure S1 Recording of membrane potential in IB4-negative small DRG neurons.**

(A) Quantitative analysis showed that the membrane potential of IB4-negative small DRG neurons recorded in the current-clamp mode was not significantly different between  $Fxyd2^{+/+}$  mice and  $Fxyd2^{-/-}$  mice (n = 70 for  $Fxyd2^{+/+}$  and n = 54 for  $Fxyd2^{-/-}$  mice). (B) Quantitative analysis showed that the membrane potential of IB4-negative and capsaicin-sensitive small DRG neurons recorded in the current-clamp mode was not significantly different between  $Fxyd2^{+/+}$  mice and  $Fxyd2^{-/-}$  mice (n = 9 for  $Fxyd2^{+/+}$  and n = 12 for  $Fxyd2^{-/-}$  mice).
