# Supplementary material
Source: PubMed Central journal article supplement (PMC4349241)
Supplement: cr201512x3.pdf [file cr201512x3.pdf]

## Supplementary information, Figure S3

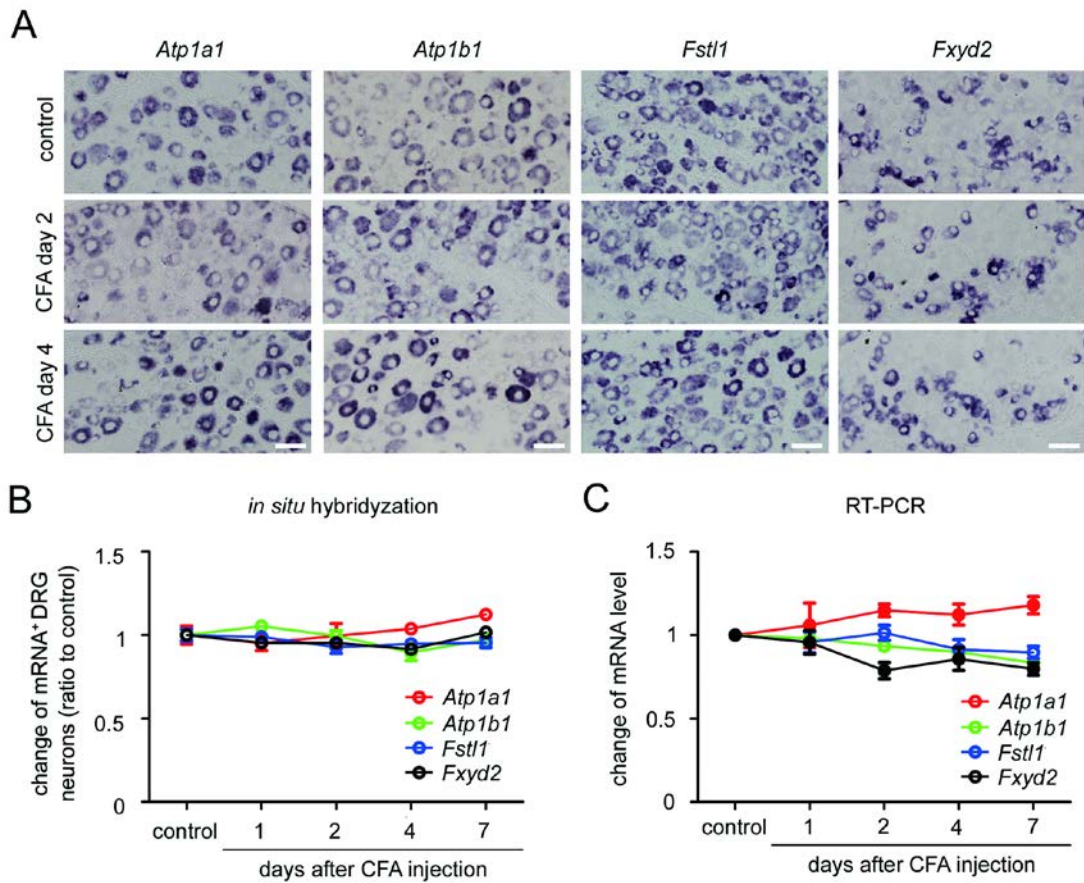

**Figure S3 Expression of  $\alpha 1$  and  $\beta 1$  subunits of NKA, FSTL1 and FXD2 in DRGs after peripheral inflammation.** (A, B) Representative images and quantitative data for *in situ* hybridization showed that the cellular distribution and levels of mRNA encoding the  $\alpha 1$  subunit (*Atp1a1*) and  $\beta 1$  subunit (*Atp1b1*) of NKA, FSTL1 (*Fstl1*) and FXD2 (*Fxyd2*) were not obviously changed in the DRGs after peripheral inflammation (n = 3). Scale bar, 50  $\mu$ m. (C) Real-time PCR showed that the mRNA levels of the  $\alpha 1$  and  $\beta 1$  subunits of NKA, FSTL1 and FXD2 in the DRGs were not significantly altered after peripheral inflammation (n = 3).
