# Supplementary material
Source: PubMed Central journal article supplement (PMC4349241)
Supplement: cr201512x4.pdf [file cr201512x4.pdf]

## Supplementary information, Figure S4

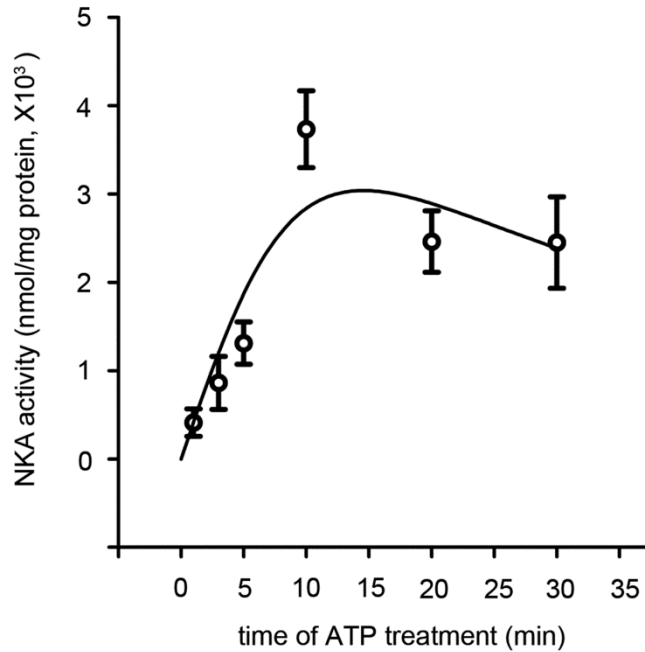

**Figure S4 Time course of NKA activity in ATP-treated microsomes.** Time course showed the NKA activity in the purified microsomes (20  $\mu$ g) of mouse DRG after the ATP treatment. The reaction was induced by adding ATP (2.5 mM) into the reaction buffer at 37 °C, and was terminated by adding trichloroacetic acid after incubation for 1, 3, 5, 10, 20 or 30 min. NKA activity was plotted against the reaction time. The NKA activity detected at 10 min was fitted within the linear range of the NKA activity-time curve, whereas the NKA activity detected at 20 and 30 min was out of the linear range (n = 3).
